# Supplementary material for: Adaptation Strategies of Seedling Root Response to Nitrogen and Phosphorus Addition
Source: MDPI journal article supplement (doi:10.3390/plants13040536), 2024-02-15
Supplement: s1 [file s1]

## *Supplementary materials*

**Table S1. Soil physical and chemical properties under different nitrogen and phosphorus addition treatments**

| Treatment                     | pH           | TC mg/g      | TN mg/g      | AN mg/g      | NN mg/g        | TP mg/g      | AP mg/g      |
|-------------------------------|--------------|--------------|--------------|--------------|----------------|--------------|--------------|
| N <sub>0</sub> P <sub>0</sub> | 4.99±0.0200  | 2.463±0.0189 | 0.408±0.0696 | 0.01±0.0005  | 0.0009±0.00011 | 0.033±0.0017 | 0.044±0.0022 |
| N <sub>0</sub> P <sub>1</sub> | 4.79±0.0115  | 1.906±0.0049 | 0.309±0.0349 | 0.009±0.0005 | 0.0027±0.00024 | 0.017±0.007  | 0.044±0.0012 |
| N <sub>0</sub> P <sub>2</sub> | 5.19±0.0586  | 2.431±0.0051 | 0.418±0.0282 | 0.008±0.0003 | 0.0008±0.00008 | 0.319±0.2486 | 0.048±0.0034 |
| N <sub>0</sub> P <sub>3</sub> | 5.230±0.0173 | 2.268±0.0134 | 0.322±0.0438 | 0.009±0.0005 | 0.0001±0.00004 | 0.046±0.0057 | 0.056±0.0056 |
| N <sub>1</sub> P <sub>0</sub> | 4.817±0.0120 | 2.04±0.0118  | 0.345±0.0204 | 0.007±0.0002 | 0.0044±0.00003 | 0.224±0.1778 | 0.053±0.0047 |
| N <sub>1</sub> P <sub>1</sub> | 4.747±0.0233 | 2.437±0.0540 | 0.473±0.0179 | 0.008±0.0001 | 0.0043±0.00317 | 0.048±0.0025 | 0.043±0.0009 |
| N <sub>1</sub> P <sub>2</sub> | 4.773±0.012  | 2.175±0.3726 | 0.315±0.0609 | 0.007±0.0002 | 0.0005±0.00003 | 0.019±0.0083 | 0.054±0.0046 |
| N <sub>1</sub> P <sub>3</sub> | 4.917±0.0088 | 2.091±0.1925 | 0.314±0.051  | 0.007±0.0003 | 0.0003±0.00002 | 0.05±0.0083  | 0.067±0.0111 |
| N <sub>2</sub> P <sub>0</sub> | 4.167±0.0033 | 2.144±0.0415 | 0.35±0.0452  | 0.01±0.0004  | 0.0281±0.00041 | 0.039±0.0073 | 0.044±0.0009 |
| N <sub>2</sub> P <sub>1</sub> | 4.073±0.0033 | 1.99±0.13470 | 0.382±0.0692 | 0.023±0.0002 | 0.0182±0.00015 | 0.011±0.0063 | 0.041±0.0037 |
| N <sub>2</sub> P <sub>2</sub> | 4.117±0.0033 | 1.695±0.0744 | 0.319±0.0198 | 0.008±0.0002 | 0.0096±0.00006 | 0.012±0.0055 | 0.048±0.0020 |
| N <sub>2</sub> P <sub>3</sub> | 4.047±0.0033 | 1.585±0.0389 | 0.307±0.0324 | 0.013±0.0002 | 0.0129±0.0001  | 0.029±0.0094 | 0.047±0.0011 |
| N <sub>3</sub> P <sub>0</sub> | 3.950±0.0058 | 2.056±0.2687 | 0.442±0.0965 | 0.061±0.0011 | 0.0215±0.00015 | 0.039±0.0094 | 0.051±0.0067 |
| N <sub>3</sub> P <sub>1</sub> | 3.957±0.0033 | 1.996±0.0126 | 0.436±0.0554 | 0.028±0.0004 | 0.0314±0.00016 | 0.061±0.0444 | 0.065±0.0066 |
| N <sub>3</sub> P <sub>2</sub> | 3.917±0.0203 | 2.008±0.0064 | 0.47±0.012   | 0.052±0.0002 | 0.0297±0.00014 | 0.023±0.0102 | 0.049±0.0013 |
| N <sub>3</sub> P <sub>3</sub> | 3.960±0.0100 | 2.279±0.0028 | 0.408±0.0457 | 0.079±0.0007 | 0.0287±0.00026 | 0.081±0.0125 | 0.046±0.0001 |

Note: TC: Total carbon; TN: Total nitrogen; AN: Ammonium nitrogen; NN: Nitrate nitrogen; TP: Total phosphorus; AP: Available phosphorus.

**Table S2. Level of nitrogen and phosphorus addition**

| Treatment                     | Nitrogen addition<br>concentration<br>(g m <sup>-2</sup> a <sup>-1</sup> ) | NH <sub>4</sub> Cl<br>(g/ per pot) | Phosphorus addition<br>concentration<br>(g m <sup>-2</sup> a <sup>-1</sup> ) | NaH <sub>2</sub> PO <sub>4</sub><br>(g/ per pot) |
|-------------------------------|----------------------------------------------------------------------------|------------------------------------|------------------------------------------------------------------------------|--------------------------------------------------|
| N <sub>0</sub> P <sub>0</sub> | 0                                                                          | 0                                  | 0                                                                            | 0                                                |
| N <sub>0</sub> P <sub>1</sub> | 0                                                                          | 0                                  | 0.6                                                                          | 0.070                                            |
| N <sub>0</sub> P <sub>2</sub> | 0                                                                          | 0                                  | 2.4                                                                          | 0.280                                            |
| N <sub>0</sub> P <sub>3</sub> | 0                                                                          | 0                                  | 4.2                                                                          | 0.490                                            |
| N <sub>1</sub> P <sub>0</sub> | 3.6                                                                        | 0.414                              | 0                                                                            | 0                                                |
| N <sub>1</sub> P <sub>1</sub> | 3.6                                                                        | 0.414                              | 0.6                                                                          | 0.070                                            |
| N <sub>1</sub> P <sub>2</sub> | 3.6                                                                        | 0.414                              | 2.4                                                                          | 0.280                                            |
| N <sub>1</sub> P <sub>3</sub> | 3.6                                                                        | 0.414                              | 4.2                                                                          | 0.490                                            |
| N <sub>2</sub> P <sub>0</sub> | 14.4                                                                       | 1.657                              | 0                                                                            | 0                                                |
| N <sub>2</sub> P <sub>1</sub> | 14.4                                                                       | 1.657                              | 0.6                                                                          | 0.070                                            |
| N <sub>2</sub> P <sub>2</sub> | 14.4                                                                       | 1.657                              | 2.4                                                                          | 0.280                                            |
| N <sub>2</sub> P <sub>3</sub> | 14.4                                                                       | 1.657                              | 4.2                                                                          | 0.490                                            |
| N <sub>3</sub> P <sub>0</sub> | 25.2                                                                       | 2.900                              | 0                                                                            | 0                                                |
| N <sub>3</sub> P <sub>1</sub> | 25.2                                                                       | 2.900                              | 0.6                                                                          | 0.070                                            |
| N <sub>3</sub> P <sub>2</sub> | 25.2                                                                       | 2.900                              | 2.4                                                                          | 0.280                                            |
| N <sub>3</sub> P <sub>3</sub> | 25.2                                                                       | 2.900                              | 4.2                                                                          | 0.490                                            |

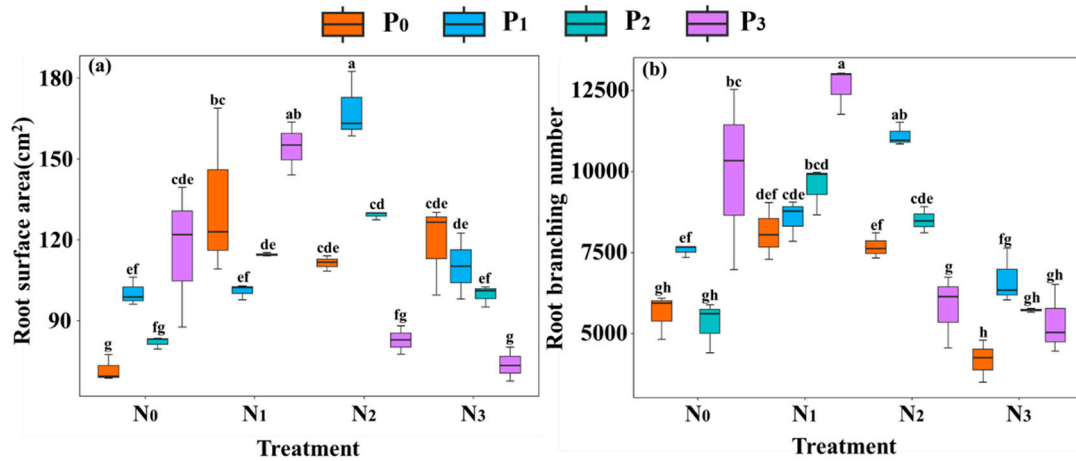

**Figure S1. Effect of nitrogen and phosphorus addition on root traits of *Castanopsis kawakamii* seedlings**

Notes: (a), (b) represent root branching number, root surface area, respectively. N<sub>0</sub>P<sub>i</sub>: single phosphorus addition treatment, N<sub>i</sub>P<sub>0</sub>: single nitrogen addition treatment, N<sub>1</sub>P<sub>i</sub>: low nitrogen and phosphorus interaction treatment, N<sub>2</sub>P<sub>i</sub>: medium nitrogen and phosphorus interaction treatment, N<sub>3</sub>P<sub>i</sub>: high nitrogen and phosphorus interaction treatment, where i=1,2,3. The differences represented by different lowercase letters between treatments with different nitrogen and phosphorus concentrations added are significant ( $p < 0.05$ ). The same applies to the following.

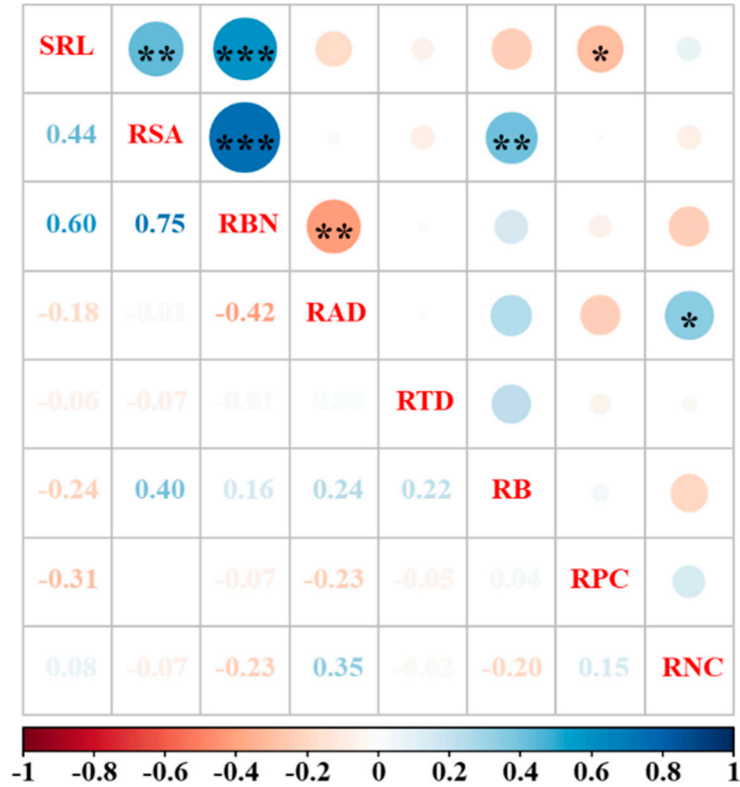

**Figure S2. Correlation between root traits of *Castanopsis kawakamii* seedlings**

Note: In the figure, SRL, RSA, RBN, RAD, RTD, RB, RPC, and RNC represent specific root length, root surface area, root branching number, root average diameter, root tissue density, root biomass, phosphorus content, and nitrogen content of the roots, respectively. The same applies to the following. In the figure, \* denotes a significant correlation at the 0.05 level, \*\* denotes a highly significant correlation at the 0.01 level, and \*\*\* denotes a highly significant correlation at the 0.001 level.

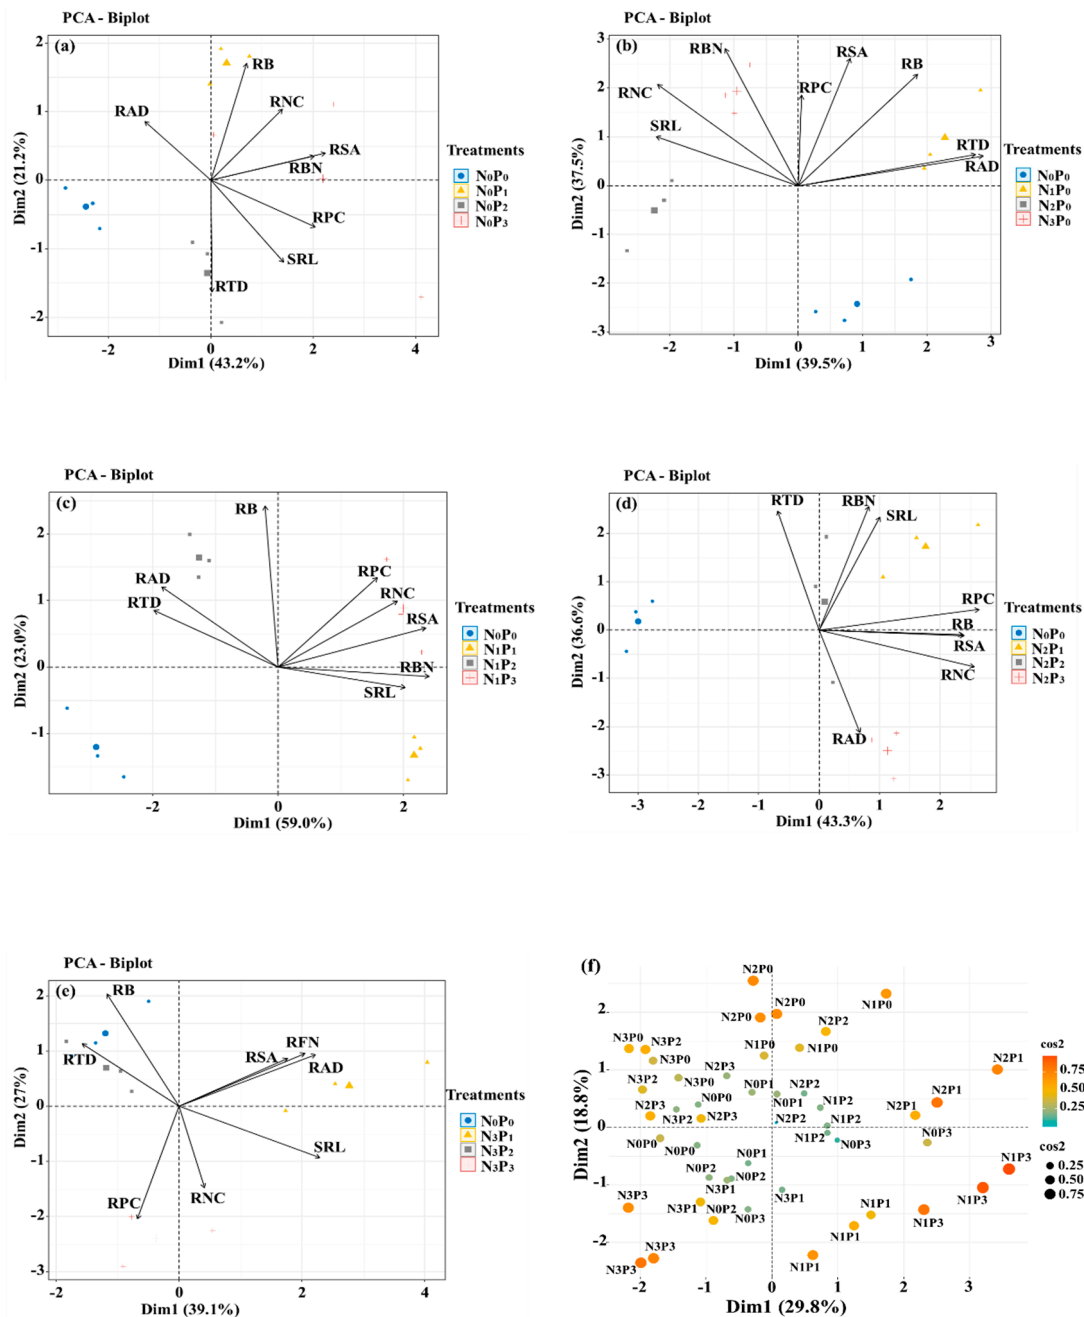

**Figure S3. Principal component analysis (PCA) of root traits under different nitrogen and phosphorus addition treatments.**

Note: NoP<sub>0</sub> is a non-nitrogen phosphorus addition treatment, (a): Single phosphorus addition treatment (NoP<sub>i</sub>); (b): Single nitrogen addition treatment (N<sub>i</sub>P<sub>0</sub>); (c): Low nitrogen and phosphorus interactive addition treatment (N<sub>1</sub>P<sub>i</sub>); (d): Interactive addition of medium nitrogen and phosphorus (N<sub>2</sub>P<sub>i</sub>); (e): High nitrogen and phosphorus interactive addition treatment (N<sub>3</sub>P<sub>i</sub>), where, i=1, 2, 3; (f): Scatter contribution plot of

different nitrogen and phosphorus addition treatments. The  $\cos^2$  value represents the contribution of the variable to the principal component.
